# Supplementary material
Source: MDPI journal article supplement (https://www.mdpi.com/1424-2818/8/1/1)
Supplement: s1 [file s1]

# Supplementary Materials: Can Theory Improve the Scope of Quantitative Metazoan Metabarcoding?

John P. Wares and Paula Pappalardo

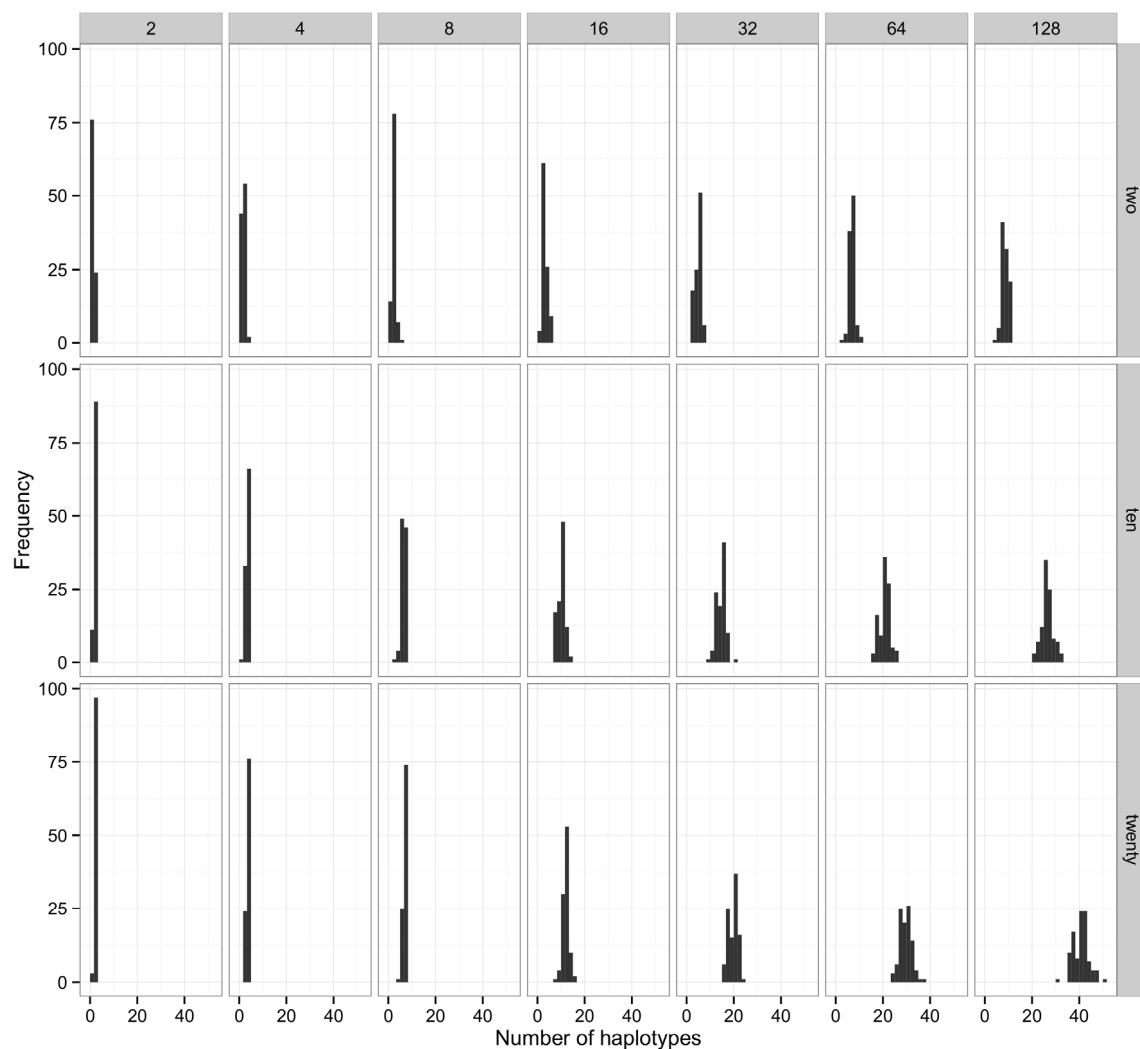

**Figure S1.** Distribution of the number of haplotypes for each combination of theta (two, ten, twenty) and sampling size (2, 4, 8, 16, 32, 64, 128).

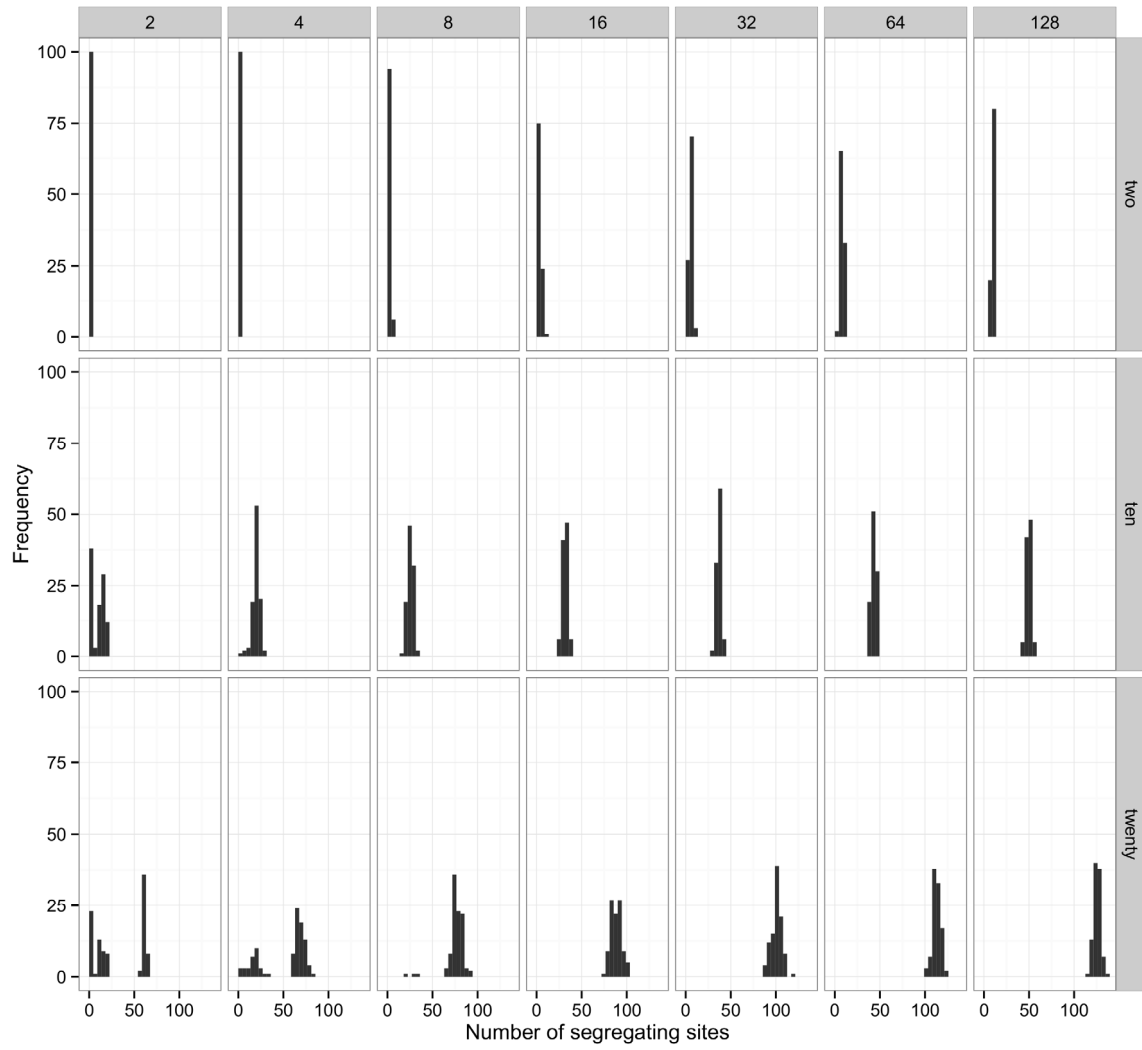

**Figure S2.** Distribution of the number of segregating sites for each combination of theta (two, ten, twenty) and sampling size (2, 4, 8, 16, 32, 64, 128).

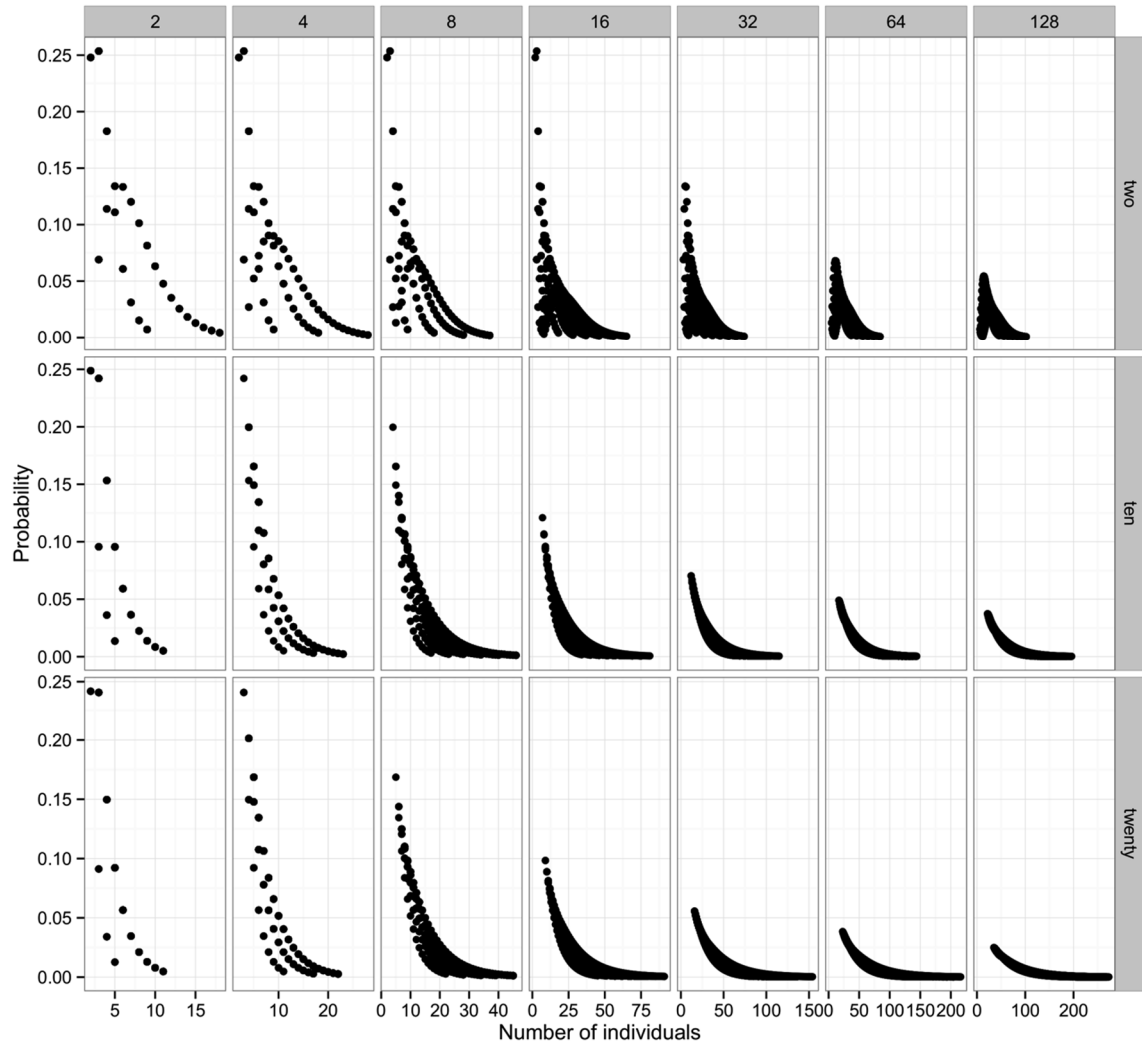

**Figure S3.** Probability distribution of the number of individuals back calculated using the gamma approach. Each panel shows a combination of simulated sampling size and the mutation rate in the original populations.
